# Supplementary material for: Interocular Symmetry Analysis of Corneal Elevation Using the Fellow Eye as the Reference Surface and Machine Learning
Source: MDPI journal article supplement (doi:10.3390/healthcare9121738), 2021-12-16
Supplement: s1 [file s1]

## Supplementary

**Table S1.** Device-generated quality and normality indicators extracted from each CSV file and their recoding into fewer categories.

| Variable | Indicative of                  | Unit/Categories                       | New Code |
|----------|--------------------------------|---------------------------------------|----------|
| QS Error | Error during imaging           | 0                                     | OK       |
|          |                                | 1, 2                                  | Error    |
| KKS      | KCN grade or other abnormality | 0                                     | Normal   |
|          |                                | 1, 1-2, 2                             | KCN1-2   |
|          |                                | 2-3, 3, 3-4, 4                        | KCN3-4   |
|          |                                | Possible, Abnormal, Cataract Surgery? | Abnormal |

QS: quality specification; KKS: keratoconus score; KCN: keratoconus.

**Table S2.** Combining the recoded quality and normality indicators into 6 bilateral categories.

| KKS                       | QS Error               | Bilateral Category        |
|---------------------------|------------------------|---------------------------|
| Normal (bilateral)        | OK (bilateral)         | Bilateral-normal/QS-OK    |
| KCN1–2 (at least 1 eye)   |                        | KCN-1-2/QS-OK             |
| KCN3–4 (at least 1 eye)   |                        | KCN-3-4/QS-OK             |
| Abnormal (at least 1 eye) |                        | KS-abnormal/QS-OK         |
| Abnormal (at least 1 eye) | Error (at least 1 eye) | Bilateral-normal/QS-error |
| Abnormal (at least 1 eye) |                        | KS-abnormal/QS-error      |

KKS: keratoconus score; QS: quality specification; KCN: keratoconus. Note: If one eye was KCN and the fellow eye Abnormal, it was placed in the KCN category.

**Table S3.** The mean  $\pm$  standard deviation (central 95% range) of the descriptive statistics of the interocular elevation difference values ( $\mu\text{m}$ ) in the central 2.0 mm – 6.0 mm zones of the cornea within each individual (n=4613).

| Statistic         | 2.0 mm                | 3.0 mm                 | 4.0 mm                   | 5.0 mm                   | 6.0 mm                    |
|-------------------|-----------------------|------------------------|--------------------------|--------------------------|---------------------------|
| Data points       | 317                   | 709                    | 1257                     | 1961                     | 2821                      |
| Skew              | 0.0 $\pm$ 0.5 (1.9)   | 0.0 $\pm$ 0.6 (2.2)    | 0.0 $\pm$ 0.9 (3.4)      | 0.1 $\pm$ 1.6 (6.4)      | 0.3 $\pm$ 2.5 (9.7)       |
| Abs-Skew          | 0.4 $\pm$ 0.3 (1.2)   | 0.5 $\pm$ 0.3 (1.3)    | 0.6 $\pm$ 0.7 (2.6)      | 0.7 $\pm$ 1.5 (5.8)      | 1.0 $\pm$ 2.3 (9.0)       |
| Kurtosis          | −0.1 $\pm$ 0.8 (3.2)  | 0.0 $\pm$ 0.7 (2.8)    | 0.6 $\pm$ 10.0 (39.3)    | 3.0 $\pm$ 50.3 (197.3)   | 7.2 $\pm$ 77.7 (304.8)    |
| Mean              | 0.0 $\pm$ 2.1 (8.3)   | 0.0 $\pm$ 2.5 (9.7)    | 0.0 $\pm$ 3.1 (12.0)     | 0.0 $\pm$ 3.9 (15.3)     | 0.2 $\pm$ 5.4 (21.3)      |
| SD                | 1.3 $\pm$ 2.0 (7.9)   | 2.0 $\pm$ 3.1 (12.3)   | 2.9 $\pm$ 4.5 (17.8)     | 4.4 $\pm$ 6.9 (27.0)     | 7.3 $\pm$ 13.3 (52.1)     |
| Abs-Mean          | 0.5 $\pm$ 2.1 (8.1)   | 0.8 $\pm$ 2.3 (9.1)    | 1.3 $\pm$ 2.8 (11.0)     | 1.8 $\pm$ 3.5 (13.6)     | 2.6 $\pm$ 4.8 (18.7)      |
| Mean-Abs          | 1.03 $\pm$ 2.4 (9.4)  | 1.7 $\pm$ 3.1 (12.2)   | 2.5 $\pm$ 4.1 (16.1)     | 3.6 $\pm$ 5.3 (20.8)     | 5.0 $\pm$ 7.1 (27.7)      |
| Median            | 0.0 $\pm$ 2.0 (7.7)   | 0.0 $\pm$ 2.2 (8.7)    | 0.0 $\pm$ 2.6 (10.3)     | −0.1 $\pm$ 3.1 (12.2)    | −0.1 $\pm$ 3.7 (14.3)     |
| Abs-Median        | 0.3 $\pm$ 1.9 (7.6)   | 0.6 $\pm$ 2.1 (8.3)    | 1.0 $\pm$ 2.4 (9.5)      | 1.3 $\pm$ 2.8 (11.1)     | 1.7 $\pm$ 3.2 (12.7)      |
| Minimum           | −2.8 $\pm$ 3.6 (14.0) | −4.8 $\pm$ 6.6 (25.9)  | −7.5 $\pm$ 10.5 (41.0)   | −11.1 $\pm$ 15.1 (59.3)  | −16.0 $\pm$ 20.9 (81.9)   |
| Maximum           | 2.9 $\pm$ 6.1 (24.1)  | 4.8 $\pm$ 9.1 (35.7)   | 7.8 $\pm$ 15.4 (60.3)    | 13.6 $\pm$ 35.5 (139.3)  | 31.3 $\pm$ 92.6 (363.0)   |
| Abs-Maximum       | 3.7 $\pm$ 6.5 (25.4)  | 6.3 $\pm$ 9.8 (38.5)   | 10.2 $\pm$ 16.5 (64.5)   | 17.4 $\pm$ 36.4 (142.5)  | 36.8 $\pm$ 92.4 (362.3)   |
| Range             | 5.7 $\pm$ 8.6 (33.7)  | 9.6 $\pm$ 14.3 (56.0)  | 15.3 $\pm$ 23.0 (90.1)   | 24.7 $\pm$ 43.3 (169.7)  | 47.3 $\pm$ 99.3 (389.1)   |
| Central 95% Range | 5.0 $\pm$ 7.9 (31.0)  | 7.8 $\pm$ 12.3 (48.4)  | 11.6 $\pm$ 17.8 (69.8)   | 17.1 $\pm$ 27.0 (105.7)  | 28.5 $\pm$ 52.1 (204.1)   |
| Negative Volume   | −1.6 $\pm$ 2.4 (9.6)  | −6.0 $\pm$ 9.5 (37.3)  | −16.1 $\pm$ 25.7 (100.7) | −35.4 $\pm$ 55.4 (217.3) | −68.4 $\pm$ 104.1 (407.9) |
| Positive Volume   | 1.7 $\pm$ 6.8 (26.5)  | 6.0 $\pm$ 17.5 (68.4)  | 15.7 $\pm$ 37.5 (147.2)  | 34.6 $\pm$ 72.1 (282.8)  | 73.6 $\pm$ 143.3 (561.8)  |
| Total Volume      | 3.3 $\pm$ 7.6 (29.8)  | 12.1 $\pm$ 22.0 (86.2) | 31.8 $\pm$ 51.5 (201.8)  | 69.9 $\pm$ 103.8 (407.0) | 142.0 $\pm$ 199.5 (782.1) |
| Volume Difference | 0.1 $\pm$ 6.7 (26.4)  | 0.0 $\pm$ 17.5 (68.8)  | −0.4 $\pm$ 38.6 (151.2)  | −0.8 $\pm$ 76.0 (297.8)  | 5.2 $\pm$ 151.4 (593.7)   |

Abs: absolute value; SD: standard deviation; Mean-Abs: Average of absolute differences; Abs-Maximum: the larger of the maximum and absolute minimum.
